# Supplementary material for: Gestational Weight Gain Charts by Gestational Age and Body Mass Index for Chinese Women: A Population-Based Follow-up Study
Source: PubMed Central journal article supplement (PMC7348073; doi:10.2188/jea.je20180238), 2020-08-05

## **eAppendix 1. Data collection details**

The unified perinatal health care cards were given for pregnant women at the first prenatal care visit and withdrawn at the 28th-day postpartum examination between all study districts or counties. All maternal information about before pregnancy, all prenatal care visits and delivery and neonatal information were included in perinatal health care cards. Maternal information was measured and recorded by well-trained local medical institution staff who participated in this project. The staff of the district and county maternal and child health institutions was responsible for input related data into MNHMS monthly in the form of electronic records. In order to ensure the quality of data, the rate of missing report and intact rate of information were checked routinely. The district and county maternal and child health institutions conduct self-examination monthly, the municipal maternal and child health institutions conduct checking quarterly, and the provincial maternal and child health institutions conduct checking annually. The content of maternal information included: maternal social demography characteristics, such as region, age, education, and nation; last menstrual period (LMP), pregnancy history, and medical history. The content of prenatal care visits included: height, weight, blood pressure measurements; required biochemical examinations, such as blood routine, hepatic and renal function examination, as well as B-ultrasound and Down's syndrome screening. The content of delivery information included: delivery mode and obstetric complications of pregnant women and birth weight, birth length, and Apgar score of neonates.

**eTable 1.** Knot number and knot location of restricted cubic splines models in four BMI categories

| BMI categories | Knot number | Knot location            |
|----------------|-------------|--------------------------|
| Underweight    | 8           | 7,13,20,26,31,35,37,40   |
| Normal weight  | 8           | 7, 13,20,26,31,35,37,40  |
| Overweight     | 8           | 12, 13,20,26,31,35,37,40 |
| Obese          | 8           | 11, 13,20,26,31,35,37,40 |

BMI, body mass index.

**eTable 2.** Smoothed mean, standard deviation, and selected centiles of gestational weight gain for underweight women (BMI <18.50 kg/m<sup>2</sup>) according to gestational age

| Gestational age, weeks | logmean  | logSD    | Centiles for GWG, kg |          |          |          |          |
|------------------------|----------|----------|----------------------|----------|----------|----------|----------|
|                        |          |          | 3th                  | 10th     | 50th     | 90th     | 97th     |
| 5                      | 1.167319 | 0.427894 | -1.56868             | -1.14179 | 0.213366 | 2.556806 | 4.214109 |
| 6                      | 1.173388 | 0.41719  | -1.53054             | -1.10469 | 0.232927 | 2.514555 | 4.112664 |
| 7                      | 1.179457 | 0.406625 | -1.49177             | -1.06719 | 0.252606 | 2.473599 | 4.014486 |
| 8                      | 1.185996 | 0.396209 | -1.4517              | -1.0284  | 0.273946 | 2.436546 | 3.922878 |
| 9                      | 1.195357 | 0.385956 | -1.40655             | -0.98356 | 0.304738 | 2.416128 | 3.853876 |
| 10                     | 1.210363 | 0.375878 | -1.35136             | -0.9265  | 0.354704 | 2.427547 | 3.826232 |
| 11                     | 1.233837 | 0.36599  | -1.28036             | -0.85021 | 0.43438  | 2.486571 | 3.858969 |
| 12                     | 1.268599 | 0.356307 | -1.18665             | -0.74641 | 0.555867 | 2.61068  | 3.972816 |
| 13                     | 1.317473 | 0.346847 | -1.06147             | -0.6047  | 0.733973 | 2.820797 | 4.192321 |
| 14                     | 1.382228 | 0.337629 | -0.89543             | -0.41413 | 0.98377  | 3.137351 | 4.540938 |
| 15                     | 1.460426 | 0.328672 | -0.6854              | -0.17156 | 1.307796 | 3.560892 | 5.017418 |
| 16                     | 1.548575 | 0.319999 | -0.43033             | 0.123568 | 1.704761 | 4.086376 | 5.613869 |
| 17                     | 1.643183 | 0.311634 | -0.13034             | 0.470475 | 2.171603 | 4.706577 | 6.320076 |
| 18                     | 1.740758 | 0.303602 | 0.212184             | 0.86572  | 2.701664 | 5.409551 | 7.12052  |
| 19                     | 1.837809 | 0.295929 | 0.59126              | 1.301741 | 3.282759 | 6.176066 | 7.991425 |
| 20                     | 1.930845 | 0.288646 | 0.996043             | 1.765385 | 3.895333 | 6.977287 | 8.898175 |
| 21                     | 2.01706  | 0.281781 | 1.412732             | 2.240309 | 4.516195 | 7.780508 | 9.802316 |
| 22                     | 2.096399 | 0.275367 | 1.835363             | 2.719776 | 5.136815 | 8.575235 | 10.69241 |
| 23                     | 2.169492 | 0.269434 | 2.260681             | 3.20041  | 5.753832 | 9.35879  | 11.56647 |
| 24                     | 2.236969 | 0.264017 | 2.685826             | 3.679392 | 6.364903 | 10.13015 | 12.42457 |
| 25                     | 2.299462 | 0.259147 | 3.108451             | 4.154583 | 6.968814 | 10.89001 | 13.26881 |
| 26                     | 2.3576   | 0.254856 | 3.52684              | 4.624639 | 7.565568 | 11.64085 | 14.10341 |
| 27                     | 2.41195  | 0.251173 | 3.939527             | 5.088545 | 8.155692 | 12.38589 | 14.93342 |
| 28                     | 2.462811 | 0.248125 | 4.343793             | 5.543849 | 8.737762 | 13.12565 | 15.76075 |
| 29                     | 2.51042  | 0.245736 | 4.736728             | 5.987886 | 9.310095 | 13.8603  | 16.58689 |
| 30                     | 2.55501  | 0.244025 | 5.115714             | 6.418328 | 9.871427 | 14.59056 | 17.41393 |
| 31                     | 2.596818 | 0.243007 | 5.478507             | 6.833243 | 10.42096 | 15.31769 | 18.24458 |
| 32                     | 2.636172 | 0.242691 | 5.824103             | 7.232083 | 10.95966 | 16.04522 | 19.08409 |
| 33                     | 2.673779 | 0.243078 | 6.15556              | 7.618937 | 11.49464 | 16.78489 | 19.9472  |
| 34                     | 2.710435 | 0.244166 | 6.477885             | 8.000079 | 12.03582 | 17.5522  | 20.85298 |
| 35                     | 2.746941 | 0.245946 | 6.797269             | 8.383109 | 12.59486 | 18.36495 | 21.82319 |
| 36                     | 2.78337  | 0.248402 | 7.113695             | 8.768372 | 13.17343 | 19.22737 | 22.86394 |
| 37                     | 2.816891 | 0.251515 | 7.39711              | 9.121152 | 13.72477 | 20.07685 | 23.90343 |
| 38                     | 2.844903 | 0.255261 | 7.61704              | 9.405862 | 14.19988 | 20.84646 | 24.86426 |
| 39                     | 2.868605 | 0.259611 | 7.782665             | 9.632877 | 14.61244 | 21.55482 | 25.76821 |
| 40                     | 2.890154 | 0.264538 | 7.915426             | 9.826908 | 14.99607 | 22.24838 | 26.66982 |
| 41                     | 2.911344 | 0.270008 | 8.034513             | 10.01019 | 15.38148 | 22.97032 | 27.62018 |
| 42                     | 2.932535 | 0.27599  | 8.144135             | 10.18747 | 15.77517 | 23.73044 | 28.63161 |

GWG, gestational weight gain; SD, standard deviation.

**eTable 3.** Smoothed mean, standard deviation, and selected centiles of gestational weight gain for overweight women (BMI 24.00–27.99 kg/m<sup>2</sup>) according to gestational age

| Gestational age, weeks | logmean  | logSD    | Centiles for GWG, kg |          |          |          |          |
|------------------------|----------|----------|----------------------|----------|----------|----------|----------|
|                        |          |          | 3th                  | 10th     | 50th     | 90th     | 97th     |
| 7                      | 1.300555 | 0.441071 | -1.40491             | -0.91246 | 0.671333 | 3.456746 | 5.450102 |
| 8                      | 1.30024  | 0.430888 | -1.37443             | -0.88574 | 0.670176 | 3.371128 | 5.286423 |
| 9                      | 1.299924 | 0.420957 | -1.34415             | -0.85937 | 0.669019 | 3.28867  | 5.129776 |
| 10                     | 1.299609 | 0.411296 | -1.31417             | -0.83342 | 0.667862 | 3.209421 | 4.980158 |
| 11                     | 1.299294 | 0.401924 | -1.28458             | -0.80796 | 0.666706 | 3.133441 | 4.837574 |
| 12                     | 1.298978 | 0.392861 | -1.2555              | -0.78309 | 0.66555  | 3.060793 | 4.702046 |
| 13                     | 1.303327 | 0.38413  | -1.21874             | -0.7484  | 0.681525 | 3.019559 | 4.609014 |
| 14                     | 1.330174 | 0.375755 | -1.14108             | -0.66221 | 0.7817   | 3.117414 | 4.693299 |
| 15                     | 1.380073 | 0.367758 | -1.01621             | -0.51731 | 0.975194 | 3.364931 | 4.965627 |
| 16                     | 1.448096 | 0.360165 | -0.84588             | -0.3166  | 1.255007 | 3.747068 | 5.40485  |
| 17                     | 1.529312 | 0.353003 | -0.63179             | -0.06277 | 1.615002 | 4.251125 | 5.99338  |
| 18                     | 1.618791 | 0.346299 | -0.37708             | 0.239855 | 2.046983 | 4.862093 | 6.711348 |
| 19                     | 1.711602 | 0.340078 | -0.08796             | 0.583364 | 2.537824 | 5.5583   | 7.531271 |
| 20                     | 1.802815 | 0.334369 | 0.224759             | 0.954377 | 3.0667   | 6.307368 | 8.413207 |
| 21                     | 1.88838  | 0.329197 | 0.547339             | 1.336241 | 3.608654 | 7.071926 | 9.311849 |
| 22                     | 1.967767 | 0.324589 | 0.874025             | 1.722286 | 4.154681 | 7.839972 | 10.21351 |
| 23                     | 2.041326 | 0.320569 | 1.201539             | 2.10897  | 4.70081  | 8.607522 | 11.11446 |
| 24                     | 2.109405 | 0.317159 | 1.526621             | 2.492823 | 5.243337 | 9.371162 | 12.01177 |
| 25                     | 2.172358 | 0.314378 | 1.846139             | 2.870578 | 5.778956 | 10.12819 | 12.9034  |
| 26                     | 2.23053  | 0.312245 | 2.157161             | 3.239224 | 6.304794 | 10.8766  | 13.78815 |
| 27                     | 2.284324 | 0.310772 | 2.457355             | 3.596475 | 6.819046 | 11.61594 | 14.66674 |
| 28                     | 2.334347 | 0.309969 | 2.746011             | 3.941979 | 7.322717 | 12.34987 | 15.54478 |
| 29                     | 2.381252 | 0.30984  | 3.023414             | 4.276549 | 7.818442 | 13.08437 | 16.43063 |
| 30                     | 2.425698 | 0.310387 | 3.290661             | 4.601933 | 8.310124 | 13.82716 | 17.33473 |
| 31                     | 2.468341 | 0.311607 | 3.549604             | 4.920739 | 8.802848 | 14.58765 | 18.26956 |
| 32                     | 2.509749 | 0.31349  | 3.802249             | 5.235731 | 9.301844 | 15.37546 | 19.24784 |
| 33                     | 2.550181 | 0.316026 | 4.04905              | 5.547754 | 9.809427 | 16.19585 | 20.2771  |
| 34                     | 2.589793 | 0.319198 | 4.290037             | 5.857101 | 10.32701 | 17.05276 | 21.3633  |
| 35                     | 2.628753 | 0.322989 | 4.525554             | 6.164412 | 10.85649 | 17.95085 | 22.51336 |
| 36                     | 2.667012 | 0.327376 | 4.754481             | 6.468498 | 11.39688 | 18.89051 | 23.72909 |
| 37                     | 2.703684 | 0.332336 | 4.969076             | 6.760012 | 11.93465 | 19.85282 | 24.98867 |
| 38                     | 2.737966 | 0.337844 | 5.161599             | 7.029442 | 12.45551 | 20.81716 | 26.26789 |
| 39                     | 2.770457 | 0.343874 | 5.335605             | 7.281014 | 12.96593 | 21.79433 | 27.58097 |
| 40                     | 2.802043 | 0.350397 | 5.49767              | 7.522695 | 13.47828 | 22.80457 | 28.95389 |
| 41                     | 2.83347  | 0.357389 | 5.65386              | 7.761904 | 14.00436 | 23.86777 | 30.41264 |
| 42                     | 2.864899 | 0.36482  | 5.805605             | 8.000369 | 14.54728 | 24.99061 | 31.96716 |

GWG, gestational weight gain; SD, standard deviation.

**eTable 4.** Smoothed mean, standard deviation, and selected centiles of gestational weight gain for obese women (BMI >28.00 kg/m<sup>2</sup>) according to gestational age

| Gestational age, weeks | Gestational |          | Centiles for GWG, kg |          |          |          |          |
|------------------------|-------------|----------|----------------------|----------|----------|----------|----------|
|                        | logmean     | logSD    | 3th                  | 10th     | 50th     | 90th     | 97th     |
| 8                      | 1.348788    | 0.428227 | -1.28496             | -0.773   | 0.852752 | 3.665323 | 5.654997 |
| 9                      | 1.329367    | 0.418653 | -1.28723             | -0.7889  | 0.778651 | 3.457507 | 5.33632  |
| 10                     | 1.309946    | 0.409461 | -1.29073             | -0.80576 | 0.705973 | 3.259224 | 5.035164 |
| 11                     | 1.290525    | 0.400676 | -1.29554             | -0.82363 | 0.634695 | 3.070195 | 4.750856 |
| 12                     | 1.273243    | 0.392326 | -1.2981              | -0.83793 | 0.57242  | 2.902766 | 4.498778 |
| 13                     | 1.268795    | 0.38444  | -1.28021             | -0.82569 | 0.556564 | 2.817541 | 4.355041 |
| 14                     | 1.287154    | 0.377045 | -1.22369             | -0.76434 | 0.622464 | 2.869517 | 4.387357 |
| 15                     | 1.326858    | 0.370173 | -1.12758             | -0.65324 | 0.769181 | 3.053756 | 4.587365 |
| 16                     | 1.383582    | 0.363852 | -0.99448             | -0.49609 | 0.989166 | 3.355447 | 4.934829 |
| 17                     | 1.453004    | 0.358111 | -0.82686             | -0.2963  | 1.275941 | 3.762457 | 5.41347  |
| 18                     | 1.5308      | 0.352979 | -0.62815             | -0.0583  | 1.621875 | 4.2617   | 6.006364 |
| 19                     | 1.612648    | 0.348483 | -0.40389             | 0.211022 | 2.016077 | 4.835831 | 6.691816 |
| 20                     | 1.694224    | 0.344648 | -0.16274             | 0.501089 | 2.442419 | 5.460205 | 7.439626 |
| 21                     | 1.771967    | 0.341496 | 0.084963             | 0.799434 | 2.882412 | 6.10735  | 8.216594 |
| 22                     | 1.845369    | 0.339046 | 0.335332             | 1.101654 | 3.330434 | 6.770301 | 9.015112 |
| 23                     | 1.914683    | 0.337313 | 0.586448             | 1.405806 | 3.784791 | 7.448347 | 9.835369 |
| 24                     | 1.980165    | 0.336308 | 0.836432             | 1.710013 | 4.243939 | 8.141085 | 10.67799 |
| 25                     | 2.042068    | 0.336039 | 1.083501             | 2.012517 | 4.706526 | 8.848448 | 11.54403 |
| 26                     | 2.100645    | 0.336506 | 1.326027             | 2.311732 | 5.171439 | 9.570744 | 12.43505 |
| 27                     | 2.156131    | 0.337706 | 1.562478             | 2.606164 | 5.637652 | 10.30839 | 13.35274 |
| 28                     | 2.208675    | 0.339633 | 1.791144             | 2.894061 | 6.103647 | 11.061   | 14.29783 |
| 29                     | 2.258407    | 0.342273 | 2.01038              | 3.173699 | 6.567839 | 11.82799 | 15.27078 |
| 30                     | 2.305455    | 0.34561  | 2.21872              | 3.443516 | 7.028745 | 12.60882 | 16.2721  |
| 31                     | 2.349953    | 0.349625 | 2.414943             | 3.702184 | 7.485079 | 13.40314 | 17.3025  |
| 32                     | 2.392196    | 0.354294 | 2.59896              | 3.949711 | 7.937486 | 14.21346 | 18.36622 |
| 33                     | 2.433159    | 0.359591 | 2.774963             | 4.191376 | 8.394826 | 15.05525 | 19.48362 |
| 34                     | 2.473995    | 0.36549  | 2.948974             | 4.434771 | 8.869778 | 15.95036 | 20.68335 |
| 35                     | 2.515848    | 0.371962 | 3.12782              | 4.68858  | 9.377096 | 16.92468 | 21.99951 |
| 36                     | 2.559218    | 0.378978 | 3.315143             | 4.957593 | 9.925705 | 17.99552 | 23.45607 |
| 37                     | 2.602022    | 0.386507 | 3.498194             | 5.225947 | 10.49099 | 19.12594 | 25.00883 |
| 38                     | 2.642178    | 0.394521 | 3.662761             | 5.475599 | 11.04375 | 20.26997 | 26.60139 |
| 39                     | 2.68014     | 0.40299  | 3.810661             | 5.708617 | 11.58713 | 21.43378 | 28.24284 |
| 40                     | 2.717008    | 0.411886 | 3.948618             | 5.933369 | 12.13497 | 22.64177 | 29.96589 |
| 41                     | 2.753695    | 0.421183 | 4.082724             | 6.157566 | 12.70054 | 23.9184  | 31.80399 |
| 42                     | 2.790378    | 0.430855 | 4.214279             | 6.382852 | 13.28718 | 25.27201 | 33.77043 |

GWG, gestational weight gain; SD, standard deviation.

**eTable 5.** Characteristics of 20,458 validation women and infants, 2015–2016

|                                                    | Value           |
|----------------------------------------------------|-----------------|
| <b>Women</b>                                       |                 |
| Age, years, mean (SD)                              | 27.3 (4.4)      |
| Height, cm, mean (SD)                              | 159.0 (4.8)     |
| Weight, kg, mean (SD)                              | 54.2 (8.7)      |
| Early pregnancy BMI, kg/m <sup>2</sup> , mean (SD) | 21.4 (3.2)      |
| Underweight (%)                                    | 3,403 (16.6)    |
| Normal weight (%)                                  | 13,333 (65.2)   |
| Overweight (%)                                     | 2,909 (14.2)    |
| Obese (%)                                          | 813 (4.0)       |
| Education ≥15 years (%)                            | 6,727 (32.9)    |
| Han ethnicity (%)                                  | 18,667 (91.2)   |
| Caesarean section (%)                              | 6,889 (33.7)    |
| Nulliparous (%)                                    | 10,627 (51.9)   |
| Gestational age at first visit, weeks, mean (SD)   | 11.7 (4.7)      |
| Gestational age at delivery, weeks, mean (SD)      | 39.4 (1.1)      |
| Weight measurements (IQR)                          | 7 (5–9)         |
| Underweight (IQR)                                  | 8 (5–10)        |
| Normal weight (IQR)                                | 7 (5–9)         |
| Overweight (IQR)                                   | 7 (5–9)         |
| Obese (IQR)                                        | 7 (5–10)        |
| <b>infants</b>                                     |                 |
| Sex, male, (%)                                     | 10,532 (51.5)   |
| Birthweight, g, mean (SD)                          | 3,241.1 (261.9) |
| Length, cm, mean (SD)                              | 50.0 (0.9)      |

BMI, body mass index; IQR, interquartile range; SD, standard deviation.

**eTable 6.** Results of the sensitivity, specificity and Youden index for four BMI categories for selected centiles

| Centiles         | BMI category  | EZ     | OZ    | TP    | FP   | FN   | TN    | SE (%) | SP (%) | YI   |
|------------------|---------------|--------|-------|-------|------|------|-------|--------|--------|------|
| 5 <sup>th</sup>  | Under weight  | -1.645 | -1.75 | 1236  | 0    | 309  | 24156 | 80.0   | 100.0  | 0.80 |
|                  | Normal weight | -1.645 | -2.13 | 4768  | 0    | 3432 | 86891 | 58.1   | 100.0  | 0.58 |
|                  | Over weight   | -1.645 | -2.67 | 1037  | 0    | 1773 | 17672 | 36.9   | 100.0  | 0.37 |
|                  | Obese         | -1.645 | -2.68 | 288   | 0    | 631  | 4918  | 31.3   | 100.0  | 0.31 |
| 15 <sup>th</sup> | Under weight  | -1.04  | -1.08 | 3857  | 0    | 157  | 21687 | 96.1   | 100.0  | 0.96 |
|                  | Normal weight | -1.04  | -1.21 | 14285 | 0    | 3152 | 77654 | 81.9   | 100.0  | 0.82 |
|                  | Over weight   | -1.04  | -1.55 | 3023  | 0    | 1929 | 15445 | 61.0   | 100.0  | 0.61 |
|                  | Obese         | -1.04  | -1.73 | 867   | 0    | 714  | 4224  | 54.8   | 100.0  | 0.55 |
| 25 <sup>th</sup> | Under weight  | -0.67  | -0.71 | 6285  | 0    | 245  | 19171 | 96.2   | 100.0  | 0.96 |
|                  | Normal weight | -0.67  | -0.77 | 23999 | 0    | 2013 | 69079 | 92.3   | 100.0  | 0.92 |
|                  | Over weight   | -0.67  | -1.01 | 5007  | 0    | 1979 | 13411 | 71.7   | 100.0  | 0.72 |
|                  | Obese         | -0.67  | -1.13 | 1415  | 0    | 710  | 3680  | 66.6   | 100.0  | 0.67 |
| 75 <sup>th</sup> | Under weight  | 0.67   | 0.49  | 4834  | 1565 | 0    | 19302 | 100.0  | 92.5   | 0.93 |
|                  | Normal weight | 0.67   | 0.50  | 17983 | 5719 | 0    | 71389 | 100.0  | 92.6   | 0.93 |
|                  | Over weight   | 0.67   | 0.43  | 3542  | 1517 | 0    | 15338 | 100.0  | 91.0   | 0.91 |
|                  | Obese         | 0.67   | 0.41  | 1038  | 415  | 0    | 4352  | 100.0  | 91.3   | 0.91 |
| 85 <sup>th</sup> | Under weight  | 1.04   | 0.82  | 2386  | 1204 | 0    | 22111 | 100.0  | 94.8   | 0.95 |
|                  | Normal weight | 1.04   | 0.78  | 9242  | 5998 | 0    | 79851 | 100.0  | 93.0   | 0.93 |
|                  | Over weight   | 1.04   | 0.74  | 1800  | 1362 | 0    | 17235 | 100.0  | 92.7   | 0.93 |
|                  | Obese         | 1.04   | 0.78  | 549   | 329  | 0    | 4927  | 100.0  | 93.7   | 0.94 |
| 95 <sup>th</sup> | Under weight  | 1.645  | 1.32  | 588   | 700  | 0    | 24413 | 100.0  | 97.2   | 0.97 |
|                  | Normal weight | 1.645  | 1.34  | 2230  | 2494 | 0    | 90367 | 100.0  | 97.3   | 0.97 |
|                  | Over weight   | 1.645  | 1.30  | 429   | 591  | 0    | 19377 | 100.0  | 97.0   | 0.97 |
|                  | Obese         | 1.645  | 1.38  | 156   | 115  | 0    | 5534  | 100.0  | 98.0   | 0.98 |

BMI, body mass index; EZ, expected Z-score; FN, false negative; FP, false positive; OZ, observed Z-score; SE, sensitivity; SP, specificity; TN, true negative; TP, true positive; YI, Youden index.

**eFigure 1.** Flowchart for selecting validation women included in study of gestational weight gain of China, 2015–2016. BMI, body mass index; GWG, gestational weight gain; LGA, large for gestational age; SGA, small for gestational age.

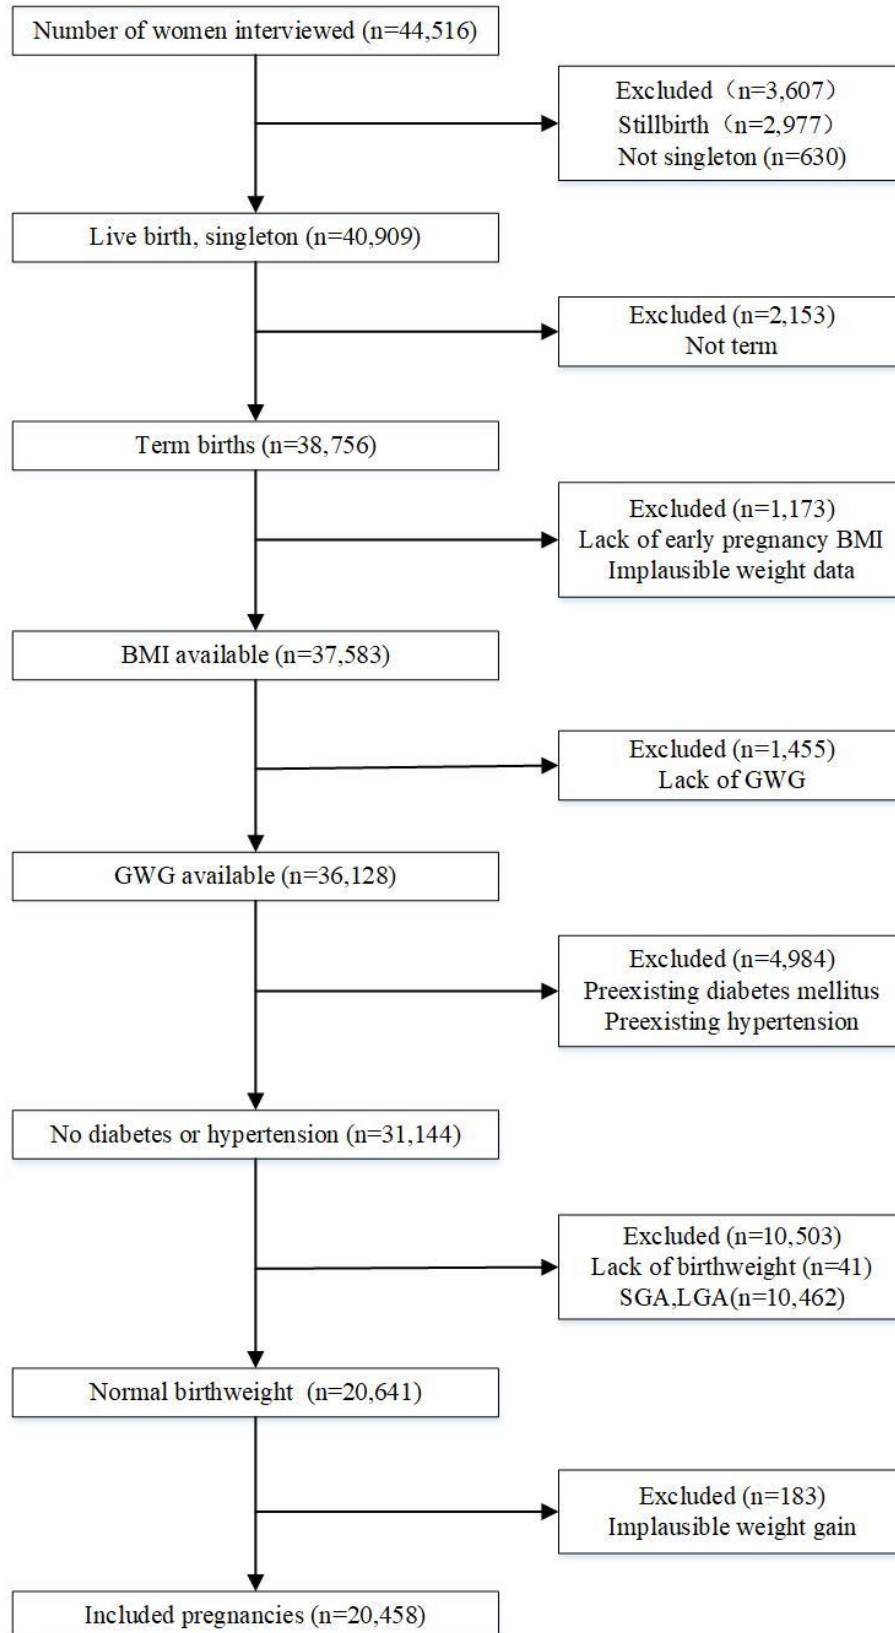



**eFigure 2.** Z-score distributions of GWG calculated from multilevel linear models in 20,458 Chinese women in 2015–2016 with four BMI categories, which superimposed on the non-skewed standard normal curve. Lines denote the observed normal distribution curves and dotted lines denote the standard normal distribution curves.

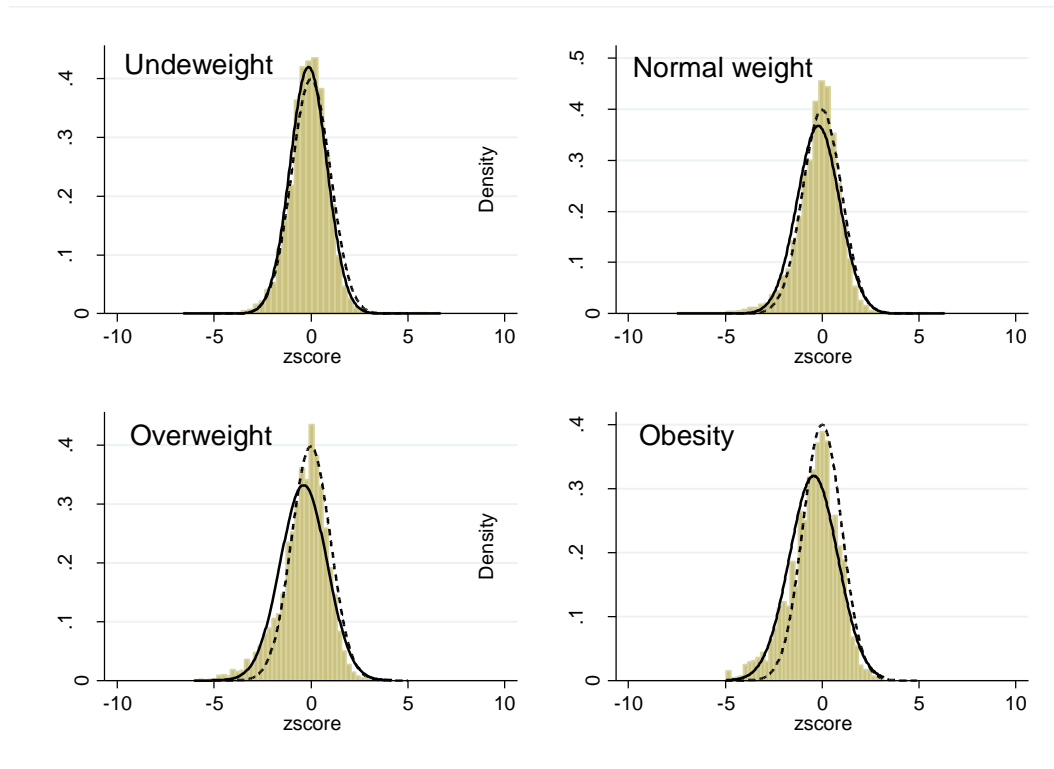

Supplement: je-30-345-s001.pdf [file je-30-345-s001.pdf]
